# Supplementary material
Source: PubMed Central journal article supplement (PMC2442315)
Supplement: M708055200_1.pdf [file M708055200_1.pdf]

# Supplemental data 1

## Sequences of primers used in the real-time RT PCR

| Genes          | Sequences of primers                                              | GenBank™<br>Accession number | Target sites<br>on genes | Product<br>sizes (bp) |
|----------------|-------------------------------------------------------------------|------------------------------|--------------------------|-----------------------|
| <i>VEGF-A</i>  | F: 5' TTTACTGCTGTACCTCCACCA 3'<br>R: 5' ATCTCTCCTATGTGCTGGCTTT 3' | M95200                       | 125-423                  | 298                   |
| <i>VEGF-B</i>  | F: 5' CCTGGAAGAACACAGCCAAT 3'<br>R: 5' GGAGTGGGATGGATGATGTC 3'    | NM_011697                    | 537-701                  | 165                   |
| <i>VEGF-C</i>  | F: 5' GGGAAGAAGTTCCACCATCA 3'<br>R: 5' ATGTGGCCTTTTCCAATACG 3'    | NM_009506                    | 1258-1392                | 135                   |
| <i>VEGF-D</i>  | F: 5' GCTGTCACTGTTGCCCACTA 3'<br>R: 5' CCCTTCCTTTCTGAGTGCTG 3'    | NM_010216                    | 1423-1611                | 189                   |
| <i>β-actin</i> | F: 5' ACCCAGATCATGTTTGAGAC 3'<br>R: 5' GTCAGGATCTTCATGAGGTAGT 3'  | X03765                       | 280-503                  | 224                   |

F: forward primer, R: reverse primer.
