# Supplementary material
Source: PubMed Central journal article supplement (PMC2442315)
Supplement: M708055200_2.pdf [file M708055200_2.pdf]

# Supplemental data 2

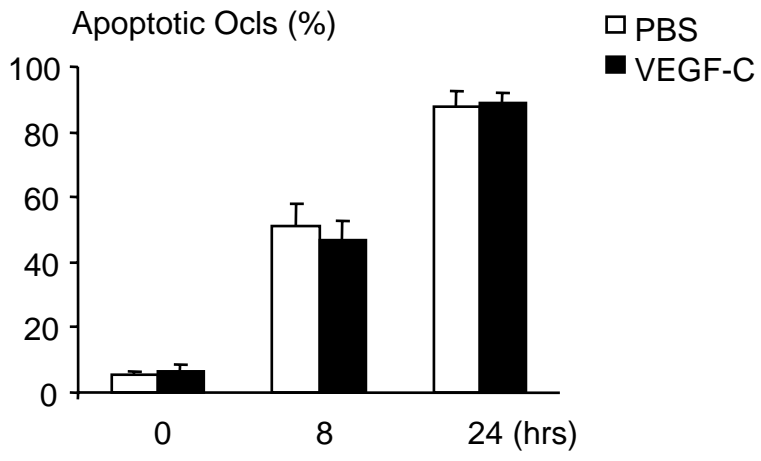

**VEGF-C treatment does not affect mature osteoclast survival.** Wt spleen cells were cultured with RANKL and M-CSF for 5 days to generate osteoclasts. When mature osteoclasts were observed under a inverted microscope, cells were washed with PBS and cultured in the presence or absence of VEGF-C (100 ng/ml) for various time points. Cells were stained for TRAP activity and the number of viable and apoptotic osteoclasts were counted. The percentage of apoptotic osteoclasts was calculated. Values are the mean plus SD of 4 wells. The same experiment was repeated once with a similar result.
